# Supplementary material for: Diagnostik und Therapie bei Kindern und Jugendlichen mit chronischem Schmerz
Source: Springer Nature journal article supplement (doi:10.1007/s00482-020-00506-5), 2020-11-13
Supplement: MOESM1 [file 18585030]

**Tab. S1** Bewertung der Invasivität, des Risikos und der psychische Belastung ausgewählter Maßnahmen durch Experten<sup>1</sup> (anhand 5-stufiger Likert-Skala; 1-5)<sup>2</sup>

| <b>Art der Maßnahme</b>        | <b>Maßnahme bzw. Wirkstoff(-Klasse)</b><br>(alphabetisch) | <b>Invasivität</b> <sup>3</sup><br>(M) | <b>Risiko</b> <sup>4</sup><br>(M) | <b>Psychische Belastung</b> <sup>5</sup><br>(M) |
|--------------------------------|-----------------------------------------------------------|----------------------------------------|-----------------------------------|-------------------------------------------------|
| <b>Diagnostik</b><br>(n = 21)  | Computertomographie                                       | 2,39                                   | 2,62                              | 2,69                                            |
|                                | Echokardiographie                                         | 1,33                                   | 1,08                              | 1,83                                            |
|                                | Elektroenzephalogramm (EEG)                               | 1,50                                   | 1,25                              | 2,17                                            |
|                                | Elektrokardiogramm (EKG)                                  | 1,42                                   | 1,25                              | 1,83                                            |
|                                | Elektrophysiologische Untersuchung (EPU)                  | 2,00                                   | 1,55                              | 2,60                                            |
|                                | Koloskopie                                                | 3,75                                   | 2,83                              | 3,92                                            |
|                                | Laparoskopie                                              | 4,67                                   | 3,33                              | 4,42                                            |
|                                | Lumbalpunktion                                            | 4,08                                   | 3,17                              | 4,33                                            |
|                                | Lungenfunktionstest                                       | 1,64                                   | 1,18                              | 2,09                                            |
|                                | Miktionszystourethrogramm (MCU)                           | 3,42                                   | 2,83                              | 3,75                                            |
|                                | Magnetresonanztomographie (MRT)                           | 2,23                                   | 1,85                              | 3,23                                            |
|                                | Magnetresonanztomographie (MRT) mit Kontrastmittel        | 2,83                                   | 2,50                              | 3,17                                            |
|                                | Ösophago-Gastro-Duodenoskopie (ÖGD)                       | 3,75                                   | 2,75                              | 3,83                                            |
|                                | Positronen-Emissions-Tomographie (PET)                    | 2,82                                   | 2,55                              | 3,00                                            |
|                                | Quantitative Sensorische Testung (QST)                    | 1,70                                   | 1,40                              | 1,89                                            |
|                                | Röntgen                                                   | 2,08                                   | 2,39                              | 2,08                                            |
|                                | Sonographie                                               | 1,31                                   | 1,08                              | 1,62                                            |
|                                | Szintigrafie                                              | 2,82                                   | 2,91                              | 2,91                                            |
|                                | Wasserstoffatemtests                                      | 1,70                                   | 1,50                              | 2,10                                            |
|                                | Zystoskopie                                               | 3,73                                   | 3,10                              | 4,00                                            |
| Zystomannometrie               | 3,33                                                      | 2,89                                   | 3,78                              |                                                 |
| <b>Medikamente</b><br>(n = 17) | Antidepressiva                                            | 2,90                                   | 3,33                              | 2,80                                            |
|                                | Antiemetika                                               | 2,20                                   | 2,56                              | 2,20                                            |
|                                | Acetylsalicylsäure (ASS)                                  | 2,08                                   | 3,00                              | 2,09                                            |
|                                | Benzodiazepine                                            | 3,00                                   | 3,50                              | 2,90                                            |
|                                | Gabapentin                                                | 2,43                                   | 2,71                              | 2,57                                            |
|                                | Hochpotente Opioide <sup>6</sup>                          | 3,09                                   | 3,36                              | 2,82                                            |
|                                | Homöopathika                                              | 1,67                                   | 1,75                              | 1,92                                            |
|                                | Ibuprofen                                                 | 2,08                                   | 2,33                              | 2,00                                            |
|                                | Metamizol                                                 | 2,33                                   | 2,58                              | 2,09                                            |
|                                | Niederpotente Opioide <sup>7</sup>                        | 2,64                                   | 2,91                              | 2,55                                            |
|                                | Paracetamol                                               | 2,00                                   | 2,58                              | 2,00                                            |
|                                | Protonenpumpenhemmer                                      | 2,30                                   | 2,33                              | 2,30                                            |
|                                | Pregabalin                                                | 2,71                                   | 2,71                              | 2,57                                            |
|                                | Spasmolytika                                              | 2,55                                   | 2,55                              | 2,27                                            |
|                                | Steroide                                                  | 3,10                                   | 3,20                              | 3,10                                            |
|                                | Topiramate                                                | 2,50                                   | 2,75                              | 2,50                                            |
| Triptane                       | 2,46                                                      | 2,27                                   | 2,27                              |                                                 |

|                                                |                             |      |      |      |
|------------------------------------------------|-----------------------------|------|------|------|
| <b>Medizinische Interventionen</b><br>(n = 13) | Akupunktur                  | 2,33 | 1,75 | 2,42 |
|                                                | Appendektomie               | 4,25 | 3,33 | 3,50 |
|                                                | Arthroskopie                | 4,25 | 3,33 | 3,75 |
|                                                | Biopsie                     | 3,67 | 2,50 | 3,58 |
|                                                | Cerebralshuntanlage         | 4,82 | 4,18 | 4,46 |
|                                                | Infiltrationsanästhesie     | 3,27 | 2,64 | 3,27 |
|                                                | Intraartikuläre Injektionen | 3,82 | 3,00 | 3,55 |
|                                                | Nervenblockade              | 3,60 | 3,30 | 3,30 |
|                                                | Oberflächenanästhesie       | 2,17 | 2,08 | 2,17 |
|                                                | Peri-/Epiduralanästhesie    | 4,00 | 3,20 | 3,82 |
|                                                | Plexusblockade              | 4,00 | 3,50 | 3,60 |
|                                                | Schmerzpumpe                | 3,50 | 2,70 | 2,90 |
|                                                | Spinalanästhesie            | 4,00 | 3,27 | 3,64 |

<sup>1</sup> N = 13, bestehend aus ärztlichen (Anästhesie/Schmerzmedizin, Kinderrheumatologie/-Immunologie, Neuropädiatrie, Kinder-/Jugendpsychiatrie, Kinderchirurgie/-Orthopädie, Kinderradiologie) und nicht-ärztlichen (Patienten/-Angehörige, Pflegewissenschaften, Physiotherapie, MFA) Experten; <sup>2</sup> Dimension bzw. Ausprägung des jeweiligen Items: 1 (kein), 2 (gering), 3 (mittel), 4 (hoch), 5 (sehr hoch), zzgl. 0 (keine Einschätzung möglich); <sup>3</sup> **Invasivität** wird hier definiert als Umfang der Integritätsverletzung des Körpers, <sup>4</sup> **Risiko** als die Wahrscheinlichkeit für das Auftreten und die Ausprägung unerwünschter Nebeneffekte und <sup>5</sup> **psychische Belastung** als Grad der durch die Maßnahme bedingten Beeinträchtigung der Psyche; <sup>6</sup> Analgetische Potenz  $\geq 1$ ; <sup>7</sup> Analgetische Potenz  $< 1$
