# Supplementary material for: Diagnostik und Therapie bei Kindern und Jugendlichen mit chronischem Schmerz
Source: Springer Nature journal article supplement (doi:10.1007/s00482-020-00506-5), 2020-11-13
Supplement: MOESM2 [file 18585030]

**Tab. S2** Übersicht angewendeter Maßnahmen der Diagnostik nach Jahren

| <b>Diagnostische Maßnahme</b><br>N <sup>1</sup> (%) <sup>2</sup> | <b>2004</b><br>(n = 41) | <b>2008</b><br>(n = 109) | <b>2012</b><br>(n = 200) | <b>2016</b><br>(n = 235) | $\Sigma$<br>(N = 585) | <b>Chi<sup>2</sup></b>          |
|------------------------------------------------------------------|-------------------------|--------------------------|--------------------------|--------------------------|-----------------------|---------------------------------|
| Computertomographie                                              | 6<br>(14,6)             | 18<br>(16,8)             | 13<br>(6,5)              | 14<br>(6,0)              | 51<br>(8,7)           | $\chi^2(3)=14,077$<br>$p=0,003$ |
| Echokardiographie                                                | 2<br>(4,9)              | 7<br>(6,5)               | 16<br>(8,0)              | 13<br>(5,5)              | 38<br>(6,5)           | $\chi^2(3)=1,279$<br>$p=0,734$  |
| Elektroenzephalogramm (EEG)                                      | 19<br>(46,3)            | 52<br>(48,6)             | 92<br>(46,0)             | 96<br>(40,9)             | 259<br>(44,4)         | $\chi^2(3)=2,232$<br>$p=0,526$  |
| Elektrokardiogramm (EKG)                                         | 6<br>(14,6)             | 13<br>(12,0)             | 27<br>(13,5)             | 29<br>(12,3)             | 75<br>(12,8)          | $\chi^2(3)=0,310$<br>$p=0,958$  |
| Elektrophysiologische<br>Untersuchung (EPU)                      | 2<br>(4,9)              | 10<br>(9,3)              | 20<br>(10,0)             | 18<br>(7,7)              | 50<br>(8,6)           | $\chi^2(3)=1,551$<br>$p=0,671$  |
| Koloskopie                                                       | 2<br>(4,9)              | 5<br>(4,7)               | 23<br>(11,5)             | 19<br>(8,1)              | 49<br>(8,4)           | $\chi^2(3)=5,118$<br>$p=0,163$  |
| Laparoskopie                                                     | 0<br>(0)                | 2<br>(1,8)               | 5<br>(2,5)               | 5<br>(2,1)               | 12<br>(2,1)           | $\chi^2(3)=1,091$<br>$p=0,779$  |
| Lumbalpunktion                                                   | 4<br>(9,8)              | 12<br>(11,1)             | 13<br>(6,5)              | 22<br>(9,4)              | 51<br>(8,7)           | $\chi^2(3)=2,188$<br>$p=0,534$  |
| Lungenfunktionstest                                              | 0<br>(0)                | 1<br>(0,9)               | 2<br>(1,0)               | 1<br>(0,4)               | 4<br>(0,7)            | $\chi^2(3)=0,895$<br>$p=0,827$  |
| Miktionszystourethrogramm<br>(MCU)                               | 0<br>(0)                | 1<br>(0,9)               | 1<br>(0,5)               | 1<br>(0,4)               | 3<br>(0,5)            | $\chi^2(3)=0,597$<br>$p=0,897$  |
| Magnetresonanztomographie<br>(MRT)                               | 23<br>(56,1)            | 79<br>(73,8)             | 163<br>(81,5)            | 200<br>(85,1)            | 465<br>(79,8)         | $\chi^2(3)=21,086$<br>$p<0,001$ |
| Magnetresonanztomographie<br>(MRT) mit Kontrastmittel            | 0<br>(0)                | 7<br>(6,5)               | 23<br>(11,6)             | 24<br>(10,2)             | 54<br>(9,3)           | $\chi^2(3)=6,617$<br>$p=0,085$  |
| Ösophago-Gastro-<br>Duodenoskopie (ÖGD)                          | 3<br>(7,3)              | 12<br>(11,2)             | 39<br>(19,6)             | 39<br>(16,6)             | 96<br>(16,0)          | $\chi^2(3)=6,108$<br>$p=0,106$  |
| Positronen-Emissions-<br>Tomographie (PET)                       | 0<br>(0)                | 1<br>(0,9)               | 0<br>(0)                 | 0<br>(0)                 | 1<br>(0,2)            | $\chi^2(3)=4,374$<br>$p=0,224$  |
| Quantitative Sensorische<br>Testung (QST)                        | 0<br>(0)                | 0<br>(0)                 | 1<br>(0,5)               | 0<br>(0)                 | 1<br>(0,2)            | $\chi^2(3)=1,928$<br>$p=0,587$  |
| Röntgen                                                          | 11<br>(26,8)            | 39<br>(36,4)             | 53<br>(26,5)             | 54<br>(23,0)             | 157<br>(26,9)         | $\chi^2(3)=6,810$<br>$p=0,078$  |
| Sonographie                                                      | 10<br>(24,4)            | 34<br>(32,1)             | 76<br>(38,2)             | 71<br>(30,2)             | 191<br>(32,9)         | $\chi^2(3)=4,671$<br>$p=0,197$  |
| Szintigrafie                                                     | 2<br>(4,9)              | 4<br>(3,7)               | 14<br>(7,0)              | 2<br>(0,9)               | 22<br>(3,8)           | $\chi^2(3)=11,439$<br>$p=0,010$ |
| Wasserstoffatmetests                                             | 2<br>(4,9)              | 6<br>(5,6)               | 31<br>(15,5)             | 21<br>(8,9)              | 60<br>(10,3)          | $\chi^2(3)=10,285$<br>$p=0,016$ |
| Zystoskopie                                                      | 0<br>(0)                | 1<br>(0,9)               | 0<br>(0)                 | 1<br>(0,4)               | 2<br>(0,3)            | $\chi^2(3)=1,935$<br>$p=0,586$  |
| Zystomannometrie                                                 | 0<br>(0)                | 0<br>(0)                 | 0<br>(0)                 | 1<br>(0,4)               | 1<br>(0,2)            | $\chi^2(3)=1,492$<br>$p=0,684$  |

<sup>1</sup> Anzahl Patienten, die Maßnahme erhalten haben (binär-nomiales Messniveau); <sup>2</sup> gültige Prozent
