# Supplementary material for: Diagnostik und Therapie bei Kindern und Jugendlichen mit chronischem Schmerz
Source: Springer Nature journal article supplement (doi:10.1007/s00482-020-00506-5), 2020-11-13
Supplement: MOESM3 [file 18585030]

**Tab. S3** Übersicht angewendeter medizinischer Interventionen nach Jahren

| <b>Medizinische Intervention</b><br>N <sup>1</sup> (%) <sup>2</sup> | <b>2004</b><br>(n = 41) | <b>2008</b><br>(n = 109) | <b>2012</b><br>(n = 200) | <b>2016</b><br>(n = 235) | $\Sigma$<br>(N = 585) | <b>Chi<sup>2</sup></b>         |
|---------------------------------------------------------------------|-------------------------|--------------------------|--------------------------|--------------------------|-----------------------|--------------------------------|
| Akupunktur                                                          | 7<br>(17,1)             | 18<br>(16,5)             | 34<br>(17,0)             | 37<br>(15,7)             | 96<br>(16,4)          | $\chi^2(3)=0,141$<br>$p=0,987$ |
| Appendektomie                                                       | 2<br>(4,9)              | 3<br>(2,8)               | 8<br>(4,0)               | 6<br>(2,6)               | 19<br>(3,2)           | $\chi^2(3)=1,153$<br>$p=0,764$ |
| Arthroskopie                                                        | 0<br>(0)                | 2<br>(1,8)               | 1<br>(0,5)               | 2<br>(0,9)               | 5<br>(0,9)            | $\chi^2(3)=1,886$<br>$p=0,596$ |
| Biopsie                                                             | 0<br>(0)                | 0<br>(0)                 | 5<br>(2,5)               | 4<br>(1,7)               | 9<br>(1,5)            | $\chi^2(3)=3,606$<br>$p=0,307$ |
| Cerebralschunt                                                      | 0<br>(0)                | 0<br>(0)                 | 1<br>(0,5)               | 0<br>(0)                 | 1<br>(0,2)            | $\chi^2(3)=1,928$<br>$p=0,587$ |
| Infiltrationsanästhesie                                             | 1<br>(2,4)              | 6<br>(5,5)               | 5<br>(2,5)               | 12<br>(5,1)              | 24<br>(4,1)           | $\chi^2(3)=2,740$<br>$p=0,433$ |
| Intraartikuläre Injektionen                                         | 0<br>(0)                | 0<br>(0)                 | 2<br>(1,0)               | 4<br>(1,7)               | 6<br>(1,0)            | $\chi^2(3)=2,615$<br>$p=0,455$ |
| Nervenblockade                                                      | 0<br>(0)                | 2<br>(1,8)               | 4<br>(2,0)               | 4<br>(1,7)               | 10<br>(1,7)           | $\chi^2(3)=0,824$<br>$p=0,844$ |
| Oberflächenanästhesie                                               | 0<br>(0)                | 3<br>(2,8)               | 3<br>(1,5)               | 3<br>(1,3)               | 9<br>(1,5)            | $\chi^2(3)=1,809$<br>$p=0,613$ |
| Peri-/Epiduralanästhesie                                            | 0<br>(0)                | 0<br>(0)                 | 1<br>(0,5)               | 0<br>(0)                 | 1<br>(0,2)            | $\chi^2(3)=1,928$<br>$p=0,587$ |
| Plexusblockade                                                      | 0<br>(0)                | 2<br>(1,8)               | 0<br>(0)                 | 0<br>(0)                 | 2<br>(0,3)            | $\chi^2(3)=8,764$<br>$p=0,033$ |
| Schmerzpumpe                                                        | 0<br>(0)                | 1<br>(0,9)               | 1<br>(0,5)               | 0<br>(0)                 | 2<br>(0,3)            | $\chi^2(3)=2,153$<br>$p=0,541$ |
| Spinalanästhesie                                                    | 0<br>(0)                | 1<br>(0,9)               | 0<br>(0)                 | 0<br>(0)                 | 1<br>(0,2)            | $\chi^2(3)=4,374$<br>$p=0,224$ |

<sup>1</sup> Anzahl Patienten, die Maßnahme erhalten haben (binär-nominales Messniveau); <sup>2</sup> gültige Prozent
