# Supplementary material for: Diagnostik und Therapie bei Kindern und Jugendlichen mit chronischem Schmerz
Source: Springer Nature journal article supplement (doi:10.1007/s00482-020-00506-5), 2020-11-13
Supplement: MOESM4 [file 18585030]

**Tab. S4** Übersicht im Rahmen logistischer Regression **ausgeschlossener** Variablen

| Score (Cutoff >75%-Perzentil)<br>N = 585 |                                 | Unabhängige Variable (Prädiktoren) | p                       |
|------------------------------------------|---------------------------------|------------------------------------|-------------------------|
| <b>Diagnostik</b>                        | Invasivität                     | Alter bei Schmerzbeginn            | 0,948                   |
|                                          |                                 | Geschlecht                         | 0,083                   |
|                                          |                                 | Versicherungsstatus                | 0,390                   |
|                                          |                                 | IQ                                 | 0,679                   |
|                                          |                                 | Schmerzdauer (in Monaten)          | 0,635                   |
|                                          |                                 | Hauptschmerzort Kopf               | 0,159                   |
|                                          |                                 | Hauptschmerzort Nacken             | 0,794                   |
|                                          |                                 | Hauptschmerzort Rücken             | 0,490                   |
|                                          |                                 | Hauptschmerzort Thorax             | 0,389                   |
|                                          |                                 | PPDI (der letzten 4 Wochen)        | 0,725                   |
|                                          |                                 | AFS mind. 1 Subtest über Cutoff    | 0,960                   |
|                                          |                                 | Risiko                             | Alter bei Schmerzbeginn |
|                                          | Geschlecht                      |                                    | 0,858                   |
|                                          | Versicherungsstatus             |                                    | 0,543                   |
|                                          | IQ                              |                                    | 0,908                   |
|                                          | Schmerzdauer (in Monaten)       |                                    | 0,603                   |
|                                          | Hauptschmerzort Nacken          |                                    | 0,245                   |
|                                          | Hauptschmerzort Bauch           |                                    | 0,251                   |
|                                          | Hauptschmerzort Rücken          |                                    | 0,201                   |
|                                          | Hauptschmerzort Extremitäten    |                                    | 0,274                   |
|                                          | Hauptschmerzort Thorax          |                                    | 0,225                   |
|                                          | PPDI (der letzten 4 Wochen)     |                                    | 0,836                   |
|                                          | DIKJ T-Wert $\geq 60$           |                                    | 0,157                   |
|                                          | AFS mind. 1 Subtest über Cutoff | 0,971                              |                         |
|                                          | Psychische Belastung            | Alter bei Schmerzbeginn            | 0,205                   |
|                                          |                                 | Geschlecht                         | 0,124                   |
|                                          |                                 | Versicherungsstatus                | 0,518                   |
|                                          |                                 | IQ                                 | 0,754                   |
|                                          |                                 | Schmerzdauer (in Monaten)          | 0,217                   |
|                                          |                                 | Hauptschmerzort Nacken             | 0,638                   |
|                                          |                                 | Hauptschmerzort Bauch              | 0,226                   |
|                                          |                                 | Hauptschmerzort Rücken             | 0,072                   |
|                                          |                                 | Hauptschmerzort Extremitäten       | 0,950                   |
|                                          |                                 | Hauptschmerzort Thorax             | 0,238                   |
|                                          |                                 | PPDI (der letzten 4 Wochen)        | 0,453                   |
|                                          |                                 | DIKJ T-Wert $\geq 60$              | 0,024                   |
| AFS mind. 1 Subtest über Cutoff          | 0,771                           |                                    |                         |
| <b>Medikamente</b>                       | Invasivität                     | Alter bei Schmerzbeginn            | 0,967                   |
|                                          |                                 | Geschlecht                         | 0,254                   |
|                                          |                                 | Versicherungsstatus                | 0,842                   |
|                                          |                                 | IQ                                 | 0,389                   |
|                                          |                                 | Schmerzdauer (in Monaten)          | 0,116                   |
|                                          |                                 | Hauptschmerzort Kopf               | 0,892                   |
|                                          |                                 | Hauptschmerzort Nacken             | 0,756                   |
|                                          |                                 | Hauptschmerzort Rücken             | 0,995                   |
|                                          |                                 | Hauptschmerzort Extremitäten       | 0,515                   |
|                                          |                                 | Hauptschmerzort Thorax             | 0,814                   |
|                                          |                                 | PPDI (der letzten 4 Wochen)        | 0,062                   |
|                                          |                                 | DIKJ T-Wert $\geq 60$              | 0,136                   |
|                                          | AFS mind. 1 Subtest über Cutoff | 0,256                              |                         |
|                                          | Risiko                          | Alter bei Schmerzbeginn            | 0,274                   |
|                                          |                                 | Geschlecht                         | 0,263                   |
|                                          |                                 | Versicherungsstatus                | 0,468                   |
|                                          |                                 | IQ                                 | 0,161                   |
|                                          |                                 | Schmerzdauer (in Monaten)          | 0,302                   |

|                                                      |                                                      |                                 |                         |       |
|------------------------------------------------------|------------------------------------------------------|---------------------------------|-------------------------|-------|
|                                                      |                                                      | Hauptschmerzort Kopf            | 0,608                   |       |
|                                                      |                                                      | Hauptschmerzort Nacken          | 0,453                   |       |
|                                                      |                                                      | Hauptschmerzort Bauch           | 0,223                   |       |
|                                                      |                                                      | Hauptschmerzort Rücken          | 0,378                   |       |
|                                                      |                                                      | Hauptschmerzort Extremitäten    | 0,802                   |       |
|                                                      |                                                      | Hauptschmerzort Thorax          | 0,411                   |       |
|                                                      |                                                      | AFS mind. 1 Subtest über Cutoff | 0,297                   |       |
| Psychische Belastung                                 |                                                      | Alter bei Schmerzbeginn         | 0,644                   |       |
|                                                      |                                                      | Geschlecht                      | 0,303                   |       |
|                                                      |                                                      | Versicherungsstatus             | 0,975                   |       |
|                                                      |                                                      | IQ                              | 0,460                   |       |
|                                                      |                                                      | Schmerzdauer (in Monaten)       | 0,162                   |       |
|                                                      |                                                      | Hauptschmerzort Kopf            | 0,290                   |       |
|                                                      |                                                      | Hauptschmerzort Nacken          | 0,247                   |       |
|                                                      |                                                      | Hauptschmerzort Rücken          | 0,299                   |       |
|                                                      |                                                      | Hauptschmerzort Extremitäten    | 0,160                   |       |
|                                                      |                                                      | Hauptschmerzort Thorax          | 0,868                   |       |
|                                                      |                                                      | PPDI (der letzten 4 Wochen)     | 0,057                   |       |
|                                                      |                                                      | DIKJ T-Wert $\geq 60$           | 0,567                   |       |
|                                                      |                                                      | AFS mind. 1 Subtest über Cutoff | 0,242                   |       |
|                                                      | <b>Medizinische Interventionen</b>                   | Invasivität                     | Alter bei Schmerzbeginn | 0,274 |
|                                                      |                                                      |                                 | Geschlecht              | 0,446 |
| Versicherungsstatus                                  |                                                      |                                 | 0,424                   |       |
| IQ                                                   |                                                      |                                 | 0,224                   |       |
| Schmerzdauer (in Monaten)                            |                                                      |                                 | 0,215                   |       |
| Hauptschmerzort Kopf                                 |                                                      |                                 | 0,785                   |       |
| Hauptschmerzort Nacken                               |                                                      |                                 | 0,476                   |       |
| Hauptschmerzort Bauch                                |                                                      |                                 | 0,270                   |       |
| Hauptschmerzort Rücken                               |                                                      |                                 | 0,326                   |       |
| Hauptschmerzort Extremitäten                         |                                                      |                                 | 0,702                   |       |
| Hauptschmerzort Thorax                               |                                                      |                                 | 0,396                   |       |
| PPDI (der letzten 4 Wochen)                          |                                                      |                                 | 0,078                   |       |
| Schmerzbezogene Schulfehltage (der letzten 4 Wochen) |                                                      |                                 | 0,264                   |       |
| AFS mind. 1 Subtest über Cutoff                      |                                                      | 0,300                           |                         |       |
| Risiko                                               |                                                      | Alter bei Schmerzbeginn         | 0,227                   |       |
|                                                      |                                                      | Geschlecht                      | 0,319                   |       |
|                                                      |                                                      | Versicherungsstatus             | 0,347                   |       |
|                                                      |                                                      | IQ                              | 0,207                   |       |
|                                                      |                                                      | Schmerzdauer (in Monaten)       | 0,303                   |       |
|                                                      |                                                      | Hauptschmerzort Kopf            | 0,722                   |       |
|                                                      | Hauptschmerzort Nacken                               | 0,841                           |                         |       |
|                                                      | Hauptschmerzort Bauch                                | 0,148                           |                         |       |
|                                                      | Hauptschmerzort Extremitäten                         | 0,090                           |                         |       |
|                                                      | Hauptschmerzort Thorax                               | 0,582                           |                         |       |
|                                                      | Schmerzbezogene Schulfehltage (der letzten 4 Wochen) | 0,270                           |                         |       |
| PPDI (der letzten 4 Wochen)                          | 0,865                                                |                                 |                         |       |
| DIKJ T-Wert $\geq 60$                                | 0,616                                                |                                 |                         |       |
| AFS mind. 1 Subtest über Cutoff                      | 0,344                                                |                                 |                         |       |
| Psychische Belastung                                 | Alter bei Schmerzbeginn                              | 0,820                           |                         |       |
|                                                      | Geschlecht                                           | 0,900                           |                         |       |
|                                                      | Versicherungsstatus                                  | 0,194                           |                         |       |
|                                                      | IQ                                                   | 0,496                           |                         |       |
|                                                      | Schmerzdauer (in Monaten)                            | 0,063                           |                         |       |
|                                                      | Hauptschmerzort Nacken                               | 0,262                           |                         |       |
|                                                      | Hauptschmerzort Bauch                                | 0,417                           |                         |       |
|                                                      | Hauptschmerzort Rücken                               | 0,275                           |                         |       |
| Hauptschmerzort Thorax                               | 0,567                                                |                                 |                         |       |

|                                        |                                 |                                                      |                         |
|----------------------------------------|---------------------------------|------------------------------------------------------|-------------------------|
|                                        |                                 | Schmerzbezogene Schulfehltage (der letzten 4 Wochen) | 0,278                   |
|                                        |                                 | PPDI (der letzten 4 Wochen)                          | 0,254                   |
|                                        |                                 | DIKJ T-Wert $\geq 60$                                | 0,160                   |
|                                        |                                 | AFS mind. 1 Subtest über Cutoff                      | 0,786                   |
| <b>Gesamt</b><br>(Maßnahmen insgesamt) | Invasivität                     | Alter bei Schmerzbeginn                              | 0,652                   |
|                                        |                                 | Geschlecht                                           | 0,876                   |
|                                        |                                 | Versicherungsstatus                                  | 0,953                   |
|                                        |                                 | IQ                                                   | 0,689                   |
|                                        |                                 | Schmerzdauer (in Monaten)                            | 0,232                   |
|                                        |                                 | Hauptschmerzort Nacken                               | 0,498                   |
|                                        |                                 | Hauptschmerzort Bauch                                | 0,600                   |
|                                        |                                 | Hauptschmerzort Rücken                               | 0,631                   |
|                                        |                                 | Hauptschmerzort Extremitäten                         | 0,505                   |
|                                        |                                 | Hauptschmerzort Thorax                               | 0,907                   |
|                                        |                                 | PPDI (der letzten 4 Wochen)                          | 0,229                   |
|                                        |                                 | DIKJ T-Wert $\geq 60$                                | 0,269                   |
|                                        |                                 | AFS mind. 1 Subtest über Cutoff                      | 0,537                   |
|                                        |                                 | Risiko                                               | Alter bei Schmerzbeginn |
|                                        | Geschlecht                      |                                                      | 0,650                   |
|                                        | Versicherungsstatus             |                                                      | 0,883                   |
|                                        | IQ                              |                                                      | 0,563                   |
|                                        | Schmerzdauer (in Monaten)       |                                                      | 0,311                   |
|                                        | Hauptschmerzort Kopf            |                                                      | 0,375                   |
|                                        | Hauptschmerzort Nacken          |                                                      | 0,959                   |
|                                        | Hauptschmerzort Bauch           |                                                      | 0,175                   |
|                                        | Hauptschmerzort Rücken          |                                                      | 0,890                   |
|                                        | Hauptschmerzort Thorax          |                                                      | 0,891                   |
|                                        | PPDI (der letzten 4 Wochen)     |                                                      | 0,282                   |
|                                        | DIKJ T-Wert $\geq 60$           |                                                      | 0,495                   |
|                                        | AFS mind. 1 Subtest über Cutoff | 0,474                                                |                         |
|                                        | Psychische Belastung            | Alter bei Schmerzbeginn                              | 0,960                   |
|                                        |                                 | Geschlecht                                           | 0,580                   |
|                                        |                                 | Versicherungsstatus                                  | 0,674                   |
|                                        |                                 | IQ                                                   | 0,549                   |
|                                        |                                 | Schmerzdauer (in Monaten)                            | 0,345                   |
|                                        |                                 | Hauptschmerzort Nacken                               | 0,969                   |
|                                        |                                 | Hauptschmerzort Bauch                                | 0,547                   |
|                                        |                                 | Hauptschmerzort Rücken                               | 0,898                   |
|                                        |                                 | Hauptschmerzort Extremitäten                         | 0,528                   |
|                                        |                                 | Hauptschmerzort Thorax                               | 0,896                   |
| PPDI (der letzten 4 Wochen)            | 0,483                           |                                                      |                         |
| DIKJ T-Wert $\geq 60$                  | 0,308                           |                                                      |                         |
| AFS mind. 1 Subtest über Cutoff        | 0,640                           |                                                      |                         |
